# Supplementary material for: Genome-Wide Association Analysis of Fruit Shape-Related Traits in Areca catechu
Source: MDPI journal article supplement (doi:10.3390/ijms24054686), 2023-02-28
Supplement: s1 [file s1]

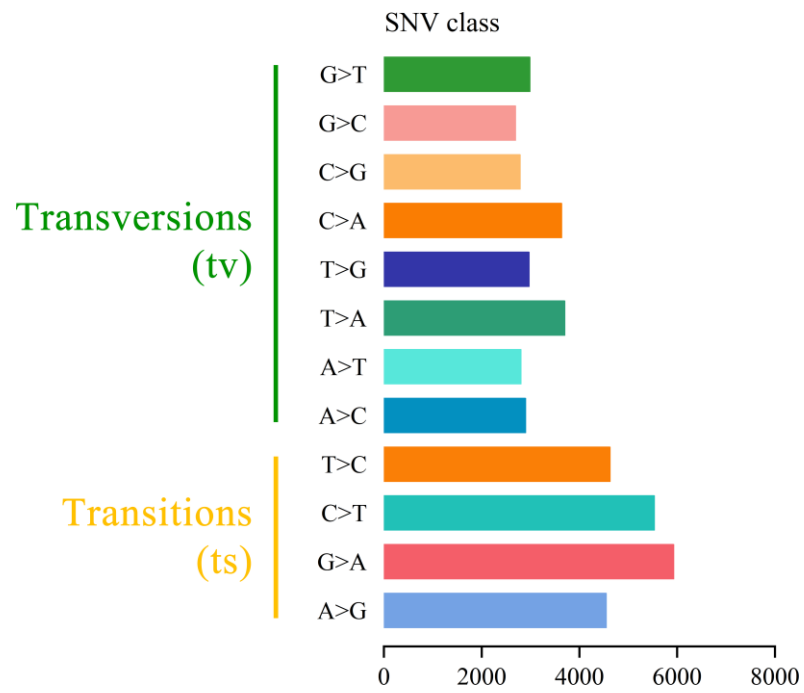

**Figure S1.** The number of Transitions (ts) type and Transversions (tv) type SNPs.

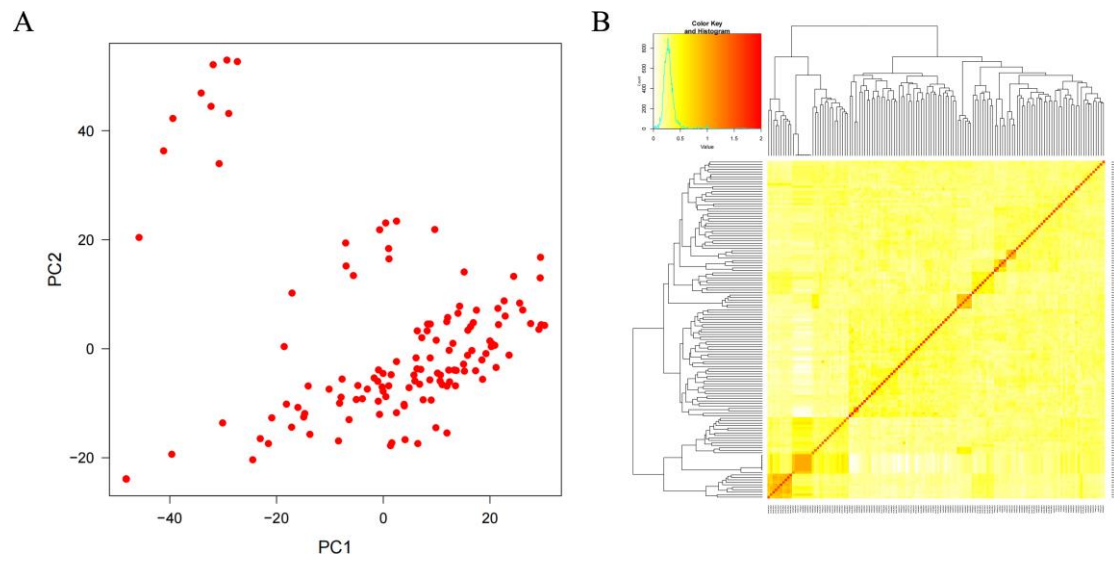

**Figure S2. Genetic relationship analysis.** (A) principal component analysis. (B) Kinship heat map.

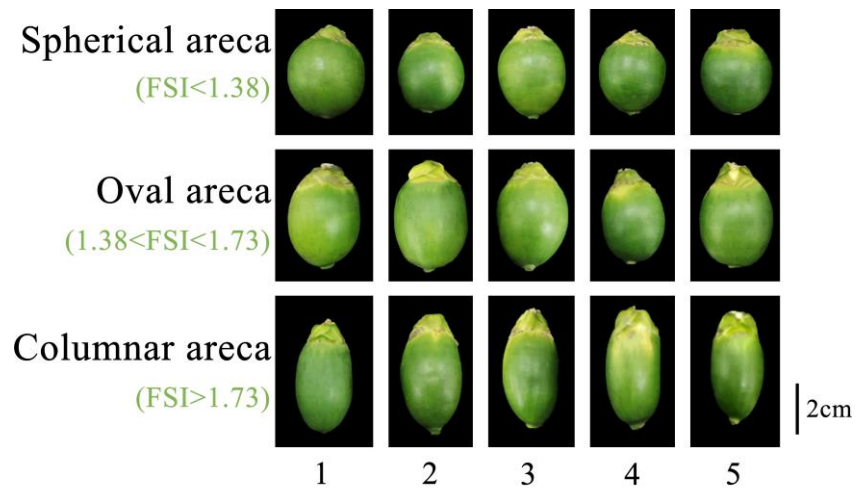

**Figure S3.** Fruit morphology of different areca germplasms. FSI: fruit shape index.
