# Supplementary material for: Genome-Wide Association Analysis of Fruit Shape-Related Traits in Areca catechu
Source: Int J Mol Sci. 2023 Feb 28;24(5):4686. doi: 10.3390/ijms24054686 (PMC10003628; doi:10.3390/ijms24054686)
Supplement: Supplementary file 1 [file ijms-24-04686-s001.zip › Additional file Table.xlsx]

## Sheet: Table S1
Table S1. The 137 areca germplasm resources used for GWAS.
ID	Name	Origin	Fruit Shape
1	B1	Hainan Province, China	Oval
2	B2	Hainan Province, China	Oval
3	B3	Hainan Province, China	Oval
4	B4	Hainan Province, China	Oval
5	B5	Hainan Province, China	Oval
6	B6	Hainan Province, China	Oval
7	B7	Hainan Province, China	Oval
8	B8	Hainan Province, China	Oval
9	B9	Hainan Province, China	Oval
10	B10	Hainan Province, China	Oval
11	B11	Hainan Province, China	Oval
12	B12	Hainan Province, China	Oval
13	B13	Hainan Province, China	Oval
14	B14	Hainan Province, China	Oval
15	B15	Hainan Province, China	Oval
16	B16	Hainan Province, China	Oval
17	B17	Hainan Province, China	Oval
18	B18	Hainan Province, China	Oval
19	A1	Hainan Province, China	Spherical
20	A2	Hainan Province, China	Spherical
21	A3	Hainan Province, China	Spherical
22	A4	Hainan Province, China	Spherical
23	A5	Hainan Province, China	Spherical
24	A6	Hainan Province, China	Spherical
25	A7	Hainan Province, China	Spherical
26	A8	Hainan Province, China	Spherical
27	A9	Hainan Province, China	Spherical
28	A10	Hainan Province, China	Spherical
29	A11	Hainan Province, China	Spherical
30	C1	Hainan Province, China	Columnar
31	C2	Hainan Province, China	Columnar
32	C3	Hainan Province, China	Columnar
33	C4	Hainan Province, China	Columnar
34	C5	Hainan Province, China	Columnar
35	C6	Hainan Province, China	Columnar
36	C7	Hainan Province, China	Columnar
37	C8	Hainan Province, China	Columnar
38	C9	Hainan Province, China	Columnar
39	C10	Hainan Province, China	Columnar
40	C11	Hainan Province, China	Columnar
41	C12	Hainan Province, China	Columnar
42	C13	Hainan Province, China	Columnar
43	C14	Hainan Province, China	Columnar
44	C15	Hainan Province, China	Columnar
45	C16	Hainan Province, China	Columnar
46	C17	Hainan Province, China	Columnar
47	C18	Hainan Province, China	Columnar
48	C19	Hainan Province, China	Columnar
49	C20	Hainan Province, China	Columnar
50	C21	Hainan Province, China	Columnar
51	C22	Hainan Province, China	Columnar
52	C23	Hainan Province, China	Columnar
53	C24	Hainan Province, China	Columnar
54	C25	Hainan Province, China	Columnar
55	C26	Hainan Province, China	Columnar
56	C27	Hainan Province, China	Columnar
57	Y1	Hainan Province, China	Spherical
58	Y19	Hainan Province, China	Spherical
59	Y21	Hainan Province, China	Spherical
60	Y22	Hainan Province, China	Spherical
61	Y20	Hainan Province, China	Spherical
62	Y13	Hainan Province, China	Spherical
63	Y30	Hainan Province, China	Spherical
64	Y23	Hainan Province, China	Spherical
65	Y24	Hainan Province, China	Spherical
66	Y9	Hainan Province, China	Spherical
67	Y27	Hainan Province, China	Spherical
68	Y10	Hainan Province, China	Spherical
69	Y28	Hainan Province, China	Spherical
70	Y15	Hainan Province, China	Spherical
71	Y17	Hainan Province, China	Spherical
72	Y16	Hainan Province, China	Spherical
73	Y2	Hainan Province, China	Spherical
74	Y3	Hainan Province, China	Spherical
75	Y4	Hainan Province, China	Spherical
76	Y5	Hainan Province, China	Spherical
77	Y6	Hainan Province, China	Spherical
78	Y7	Hainan Province, China	Spherical
79	Y8	Hainan Province, China	Spherical
80	Y11	Hainan Province, China	Spherical
81	Y12	Hainan Province, China	Spherical
82	Y14	Hainan Province, China	Spherical
83	Y18	Hainan Province, China	Spherical
84	Y26	Hainan Province, China	Spherical
85	Y25	Hainan Province, China	Spherical
86	Y29	Hainan Province, China	Spherical
87	T1	Hainan Province, China	Spherical
88	T2	Hainan Province, China	Spherical
89	X28	Hainan Province, China	Columnar
90	X8	Hainan Province, China	Columnar
91	X1	Hainan Province, China	Columnar
92	X20	Hainan Province, China	Columnar
93	X11	Hainan Province, China	Columnar
94	X16	Hainan Province, China	Columnar
95	X2	Hainan Province, China	Columnar
96	X3	Hainan Province, China	Columnar
97	X19	Hainan Province, China	Columnar
98	X12	Hainan Province, China	Columnar
99	X15	Hainan Province, China	Columnar
100	X9	Hainan Province, China	Columnar
101	X7	Hainan Province, China	Columnar
102	X23	Hainan Province, China	Columnar
103	X22	Hainan Province, China	Columnar
104	X21	Hainan Province, China	Columnar
105	X17	Hainan Province, China	Columnar
106	X4	Hainan Province, China	Columnar
107	X14	Hainan Province, China	Columnar
108	X13	Hainan Province, China	Columnar
109	X26	Hainan Province, China	Columnar
110	X24	Hainan Province, China	Columnar
111	X29	Hainan Province, China	Columnar
112	X5	Hainan Province, China	Columnar
113	X27	Hainan Province, China	Columnar
114	X25	Hainan Province, China	Columnar
115	X6	Hainan Province, China	Columnar
116	X18	Hainan Province, China	Columnar
117	X10	Hainan Province, China	Columnar
118	T10	Hainan Province, China	Columnar
119	T8	Hainan Province, China	Columnar
120	T3	Hainan Province, China	Columnar
121	T6	Hainan Province, China	Columnar
122	T9	Hainan Province, China	Columnar
123	T7	Hainan Province, China	Columnar
124	T4	Hainan Province, China	Columnar
125	T5	Hainan Province, China	Columnar
126	NJ4	Vietnam	Columnar
127	NJ8	Vietnam	Columnar
128	NJ9	Vietnam	Columnar
129	NJ6	Vietnam	Columnar
130	NJ7	Vietnam	Columnar
131	NJ2	Vietnam	Columnar
132	NJ3	Vietnam	Columnar
133	NJ12	Vietnam	Columnar
134	NJ11	Vietnam	Columnar
135	NJ10	Vietnam	Columnar
136	NJ5	Vietnam	Columnar
137	NJ1	Vietnam	Columnar

## Sheet: Table S2
Table S2. Variants distribution in chromosomal regions
CHR	Length	Variants	Variants rate
1	171974900	3180	54080
2	177277540	2912	60878
3	178672880	3565	50118
4	135123568	2633	51319
5	123019518	2308	53301
6	96290705	1861	51741
7	91998238	1591	57824
8	121938711	2544	47931
9	142848268	2893	49377
10	194812103	3992	48800
11	161185281	3016	53443
12	123032770	2267	54271
13	151440044	2760	54869
14	181878420	3937	46197
15	204195814	3911	52210
16	198959453	3508	56715
Total	2454648213	46878

## Sheet: Table S3
Table S3. Markers of genetic and non-genic regions
Type	Count	Percent
Intergenic	37003	0.65808
Intronic	8984	0.15978
Splicing	84	0
Upstream	3986	0.07089
Downstream	4468	0.07946
Exonic	1219	0.02168
3'UTR	280	0.00498
5'UTR	203	0.00361

## Sheet: Table S4
Table S4. 200 significant variation sites
SNP	CHR	BP	P	SNP	CHR	BP	P
Chr390614368	3	90614368	2.83e-05	Chr1130457737	1	130457737	0.000481123
Chr16118948443	16	118948443	4.42e-05	Chr15195759491	15	195759491	0.000483329
Chr16118948447	16	118948447	4.42e-05	Chr15195759492	15	195759492	0.000483329
Chr239402250	2	39402250	4.81e-05	Chr15172652284	15	172652284	0.000484635
Chr16124364830	16	124364830	5.05e-05	Chr15121775543	15	121775543	0.000484849
Chr1107340167	1	107340167	5.49e-05	Chr481563946	4	81563946	0.000486609
Chr727711429	7	27711429	7.83e-05	Chr886526311	8	86526311	0.000518381
Chr1107340115	1	107340115	7.95e-05	Chr258950637	2	58950637	0.000527237
Chr15106638508	15	106638508	8.73e-05	Chr250393286	2	50393286	0.000527819
Chr992447504	9	92447504	9.11e-05	Chr13112494258	13	112494258	0.000549012
Chr1698360674	16	98360674	9.21e-05	Chr255696434	2	55696434	0.000555387
Chr194832102	1	94832102	9.39e-05	Chr15156353311	15	156353311	0.00056303
Chr13149550569	13	149550569	9.89e-05	Chr1695900445	16	95900445	0.000573197
Chr4105357832	4	105357832	0.000100022	Chr24878468	2	4878468	0.000573556
Chr4105357750	4	105357750	0.000102283	Chr255696577	2	55696577	0.000583113
Chr16118948438	16	118948438	0.000104636	Chr390198240	3	90198240	0.000583675
Chr16118948439	16	118948439	0.000104636	Chr1544280977	15	44280977	0.000596478
Chr1520610508	15	20610508	0.000106259	Chr15137347778	15	137347778	0.000608902
Chr1520610510	15	20610510	0.000106259	Chr1048879738	10	48879738	0.000611035
Chr16182264753	16	182264753	0.000107068	Chr1048879744	10	48879744	0.000611035
Chr339169082	3	39169082	0.000125925	Chr10148230669	10	148230669	0.000611878
Chr339169084	3	39169084	0.000125925	Chr15139392849	15	139392849	0.000612454
Chr678066033	6	78066033	0.000126333	Chr94020666	9	4020666	0.000614699
Chr339141338	3	39141338	0.00012675	Chr550798976	5	50798976	0.000616874
Chr181798912	1	81798912	0.000131475	Chr111139804	1	11139804	0.00062481
Chr2144316513	2	144316513	0.000133992	Chr1125793374	11	25793374	0.000640983
Chr735339518	7	35339518	0.000150677	Chr1115776777	1	115776777	0.000649041
Chr24878492	2	4878492	0.000151183	Chr13120557323	13	120557323	0.000656224
Chr339141310	3	39141310	0.000153041	Chr14152021899	14	152021899	0.00065765
Chr1693770852	16	93770852	0.000160681	Chr1631732606	16	31732606	0.000675378
Chr5122460318	5	122460318	0.000162818	Chr12112811226	12	112811226	0.000679344
Chr15173827978	15	173827978	0.000165524	Chr674142730	6	74142730	0.000683184
Chr16124364810	16	124364810	0.00017609	Chr3137150496	3	137150496	0.000684795
Chr1023833977	10	23833977	0.000178214	Chr1573613459	15	73613459	0.000685873
Chr1459289322	14	59289322	0.000179204	Chr1062286679	10	62286679	0.000687431
Chr332016640	3	32016640	0.00018711	Chr14149323393	14	149323393	0.000688646
Chr978589040	9	78589040	0.000191958	Chr3146919353	3	146919353	0.000691912
Chr15108400222	15	108400222	0.000193754	Chr1148676668	11	48676668	0.000708591
Chr15108400232	15	108400232	0.000193754	Chr1148676675	11	48676675	0.000708591
Chr390180850	3	90180850	0.000193997	Chr16112819899	16	112819899	0.000722984
Chr390180861	3	90180861	0.000193997	Chr255367410	2	55367410	0.000730402
Chr15173732105	15	173732105	0.000194819	Chr352867831	3	52867831	0.000732316
Chr1599587476	15	99587476	0.000198621	Chr288232089	2	88232089	0.000744751
Chr15195512311	15	195512311	0.000199145	Chr15166749106	15	166749106	0.000746591
Chr15195512327	15	195512327	0.000199145	Chr1537471374	15	37471374	0.000759792
Chr15195512280	15	195512280	0.000199615	Chr227293559	2	27293559	0.000764255
Chr11113832016	11	113832016	0.000206141	Chr3140903880	3	140903880	0.000779171
Chr9119972087	9	119972087	0.000212307	Chr11147173131	11	147173131	0.000779502
Chr9119972092	9	119972092	0.000212307	Chr11147173141	11	147173141	0.000779502
Chr15138635342	15	138635342	0.0002271	Chr258744297	2	58744297	0.000783884
Chr16126355179	16	126355179	0.000234791	Chr1220975631	12	20975631	0.000784387
Chr16126355192	16	126355192	0.000234791	Chr16124858097	16	124858097	0.000793082
Chr1520610505	15	20610505	0.000236062	Chr11135620136	11	135620136	0.000804473
Chr954721433	9	54721433	0.000240183	Chr734331188	7	34331188	0.000812856
Chr885521246	8	85521246	0.000244393	Chr14152021875	14	152021875	0.000814905
Chr1490624771	14	90624771	0.000251496	Chr13117703567	13	117703567	0.000820164
Chr15139314540	15	139314540	0.000255663	Chr1023833921	10	23833921	0.000828499
Chr15128065400	15	128065400	0.000261211	Chr8107167529	8	107167529	0.000835475
Chr181798925	1	81798925	0.000271122	Chr313071785	3	13071785	0.000838785
Chr12112811434	12	112811434	0.000272186	Chr771502093	7	71502093	0.000841053
Chr1125793415	11	25793415	0.000273742	Chr213489915	2	13489915	0.000855369
Chr894660894	8	94660894	0.00027718	Chr1109340739	1	109340739	0.000888622
Chr358807351	3	58807351	0.000278166	Chr15138422088	15	138422088	0.000893566
Chr15138422051	15	138422051	0.000282164	Chr14103748639	14	103748639	0.000921565
Chr16108059413	16	108059413	0.000288963	Chr4116717133	4	116717133	0.000924009
Chr1494298394	14	94298394	0.000292918	Chr1197686392	11	97686392	0.00093704
Chr1494298416	14	94298416	0.000292918	Chr594797750	5	94797750	0.000950402
Chr11156446633	11	156446633	0.000302276	Chr595472136	5	95472136	0.000961576
Chr1130457752	1	130457752	0.000302882	Chr247485947	2	47485947	0.000962118
Chr1497521518	14	97521518	0.000307414	Chr1023833938	10	23833938	0.000962842
Chr359696315	3	59696315	0.000310474	Chr552432584	5	52432584	0.000966255
Chr258744327	2	58744327	0.000311039	Chr1537471361	15	37471361	0.000972317
Chr15172914595	15	172914595	0.000314967	Chr12107559783	12	107559783	0.000973391
Chr16116027873	16	116027873	0.000333526	Chr1041629571	10	41629571	0.000976298
Chr3147607921	3	147607921	0.000334803	Chr15173827904	15	173827904	0.000976583
Chr754159972	7	54159972	0.000346382	Chr14101876157	14	101876157	0.000980003
Chr13149550573	13	149550573	0.0003466	Chr1299507705	12	99507705	0.000987382
Chr4305334	4	305334	0.000348846	Chr554556297	5	54556297	0.000988921
Chr3136921231	3	136921231	0.000357289	Chr1544234566	15	44234566	0.00100062
Chr1497521488	14	97521488	0.000364223	Chr954721466	9	54721466	0.00100163
Chr1107340159	1	107340159	0.000365071	Chr3146857655	3	146857655	0.00103496
Chr15139314524	15	139314524	0.000368174	Chr25057757	2	5057757	0.00104842
Chr1064066425	10	64066425	0.000368664	Chr4105445742	4	105445742	0.0010636
Chr15139314442	15	139314442	0.000372514	Chr1427161753	14	27161753	0.0010703
Chr3155834567	3	155834567	0.000376584	Chr1216907555	12	16907555	0.00107383
Chr3114745033	3	114745033	0.000380211	Chr348057826	3	48057826	0.00108298
Chr15108523169	15	108523169	0.000380728	Chr15125121012	15	125121012	0.00109405
Chr15167800894	15	167800894	0.000401156	Chr1014305902	10	14305902	0.00109484
Chr14103548736	14	103548736	0.000412229	Chr8111605534	8	111605534	0.00110016
Chr258202815	2	58202815	0.000414834	Chr15173827749	15	173827749	0.00112292
Chr352867859	3	52867859	0.00041496	Chr15142811247	15	142811247	0.00115079
Chr4105128880	4	105128880	0.000416863	Chr15194963480	15	194963480	0.00117359
Chr10168747301	10	168747301	0.000436318	Chr1125793266	11	25793266	0.00117429
Chr12114722411	12	114722411	0.000440267	Chr15174194371	15	174194371	0.00118669
Chr765936349	7	65936349	0.000460073	Chr258202817	2	58202817	0.0011922
Chr1616370518	16	16370518	0.000467876	Chr1125793338	11	25793338	0.00119556
Chr1616370541	16	16370541	0.000467876	Chr255696569	2	55696569	0.00120324
Chr1616370571	16	16370571	0.000467876	Chr10159687623	10	159687623	0.00125523
Chr14138742055	14	138742055	0.000479958	Chr749952283	7	49952283	0.00125783
Chr1130457737	1	130457737	0.000481123	Chr749952301	7	49952301	0.00125783

## Sheet: Table S5
Table S5. Significant genes of KEGG analysis
CHR	Candidate Genes	Start	End	Description
2	Acat_2g008340	58944805	58964782	syntaxin 1B/2/3
2	Acat_2g006820	27337393	27348541	UDP-glucosyltransferase 85A2
2	Acat_2g008000	47428346	47558952	small subunit ribosomal protein S2e
3	Acat_3g012500	146918049	146925580	threonine-protein kinase ERECTA
4	Acat_4g009190	116726663	116728086	EP3-3 chitinase
6	Acat_6g004190	74192205	74200779	E3 ubiquitin-protein ligase SIAH1
8	Acat_8g010060	94625345	94667984	SET domain-containing protei SDG37
8	Acat_8g007110	85505181	85520525	ABA responsive element G-box binding factor 4
10	Acat_10g012180	41627156	41638536	protein transport protein SFT1
10	Acat_10g022980	148292471	148357415	guanylate kinase
10	Acat_10g007000	23834907	23862846	leucyl aminopeptidase
13	Acat_13g018080	149551876	149565005	CCR4-NOT transcription complex subunit 10
13	Acat_13g018090	149584760	149585371	charged multivesicular body protein 1
15	Acat_15g020130	73601427	73602028	large subunit ribosomal protein L27
15	Acat_15g028750	195532626	195536184	large subunit ribosomal protein L37Ae
16	Acat_16g009620	31739975	31746717	frataxin-like protein FH

## Sheet: Table S6
Table S6. Specific primers used for qRT-PCR
No.	Name	Orientation	Primer Sequence (5'->3')
1	AcUGT85A2	Forward	TGATGGAGACCAGAGGGAGG
		Reverse	CAGCGAAGAAAGGCCAACAC
2	AcIPT-1	Forward	GTCTGGCGATCGACCTGG
		Reverse	TGCGTTCCGAGAGAGGGA
3	AcIPT-2	Forward	TGCTGGTGGGACTGGTCT
		Reverse	AGCTGCATCCCATTGCCC
4	AcCYP735A	Forward	CCACCAACGTCACACGGT
		Reverse	ATTGGATGGTGTGGCGCA
5	AcLOG-1	Forward	CGGCCCCATCAGTCAAGG
		Reverse	GCTTCTGCTCAGCCTCCC
6	AcLOG-2	Forward	CATGACAAGCCGGTCGGT
		Reverse	TGACGAGCAGCTGGTGTG
7	AcLOG-3	Forward	TCTGCTGTTGCTCTGGGC
		Reverse	CCCATCAGTCCCGCACTC
8	AcLOG-4	Forward	TGCATGGGCTCAACTGGG
		Reverse	ACAATGATGTGGCGGGCA
9	AcLOG-5	Forward	TTCGGAAGGGTGTGCGTC
		Reverse	GCCCATGAGACCAACGCT
10	AcLOG-6	Forward	CCATTCGTCGTGCACCCA
		Reverse	TTAGTGCGCCTCCATGCC
11	AcLOG-7	Forward	CTCTGGCAACCGAACCATCT
		Reverse	GGCCAGATATCTCAAGGGGC
12	AcLOG-8	Forward	AGAGAAAATGCCGCGCCT
		Reverse	CAGGTAGCTATGCGGGGC
13	AcLOG-9	Forward	CCCGTGGGGTTGCTGAAT
		Reverse	GCTCCTCTGCTCTTCCTGC
14	AcCKX-1	Forward	GCCTCGCACCGAAATCCT
		Reverse	CGACTTGCAGCTGGTGGA
15	AcCKX-2	Forward	ATCTGGTGGCGCAGAACC
		Reverse	CGGACTGGTAGTGGGGGA
16	AcCKX-3	Forward	AAGGGTGCGATGGATTCGAG
		Reverse	CGGGTTTCGAGGGGAGAAAA
17	AcCKX-4	Forward	GCCAAAGTCGTGGACCGA
		Reverse	ATTTGGGGGCCATGGTGG
18	AcCKX-5	Forward	CCCTGCCCCAAGAGCTTC
		Reverse	TGAGTGAGGCCGCCAAAG
19	AcCKX-6	Forward	GATGTTCCTCACCCTTGGCT
		Reverse	CTCCGGCAACACTACTGACA
20	Ac actin	Forward	AAGGCTGGATTTGCTGG
		Reverse	GCCTTGGGGTTGAGAGGGGC
